# Supplementary figures and images for: Impact of Shape Irregularity in Medial Sphenoid Wing Meningiomas on Postoperative Cranial Nerve Functioning, Proliferation, and Progression-Free Survival
Source: MDPI journal article supplement (doi:10.3390/cancers15123096), 2023-06-07

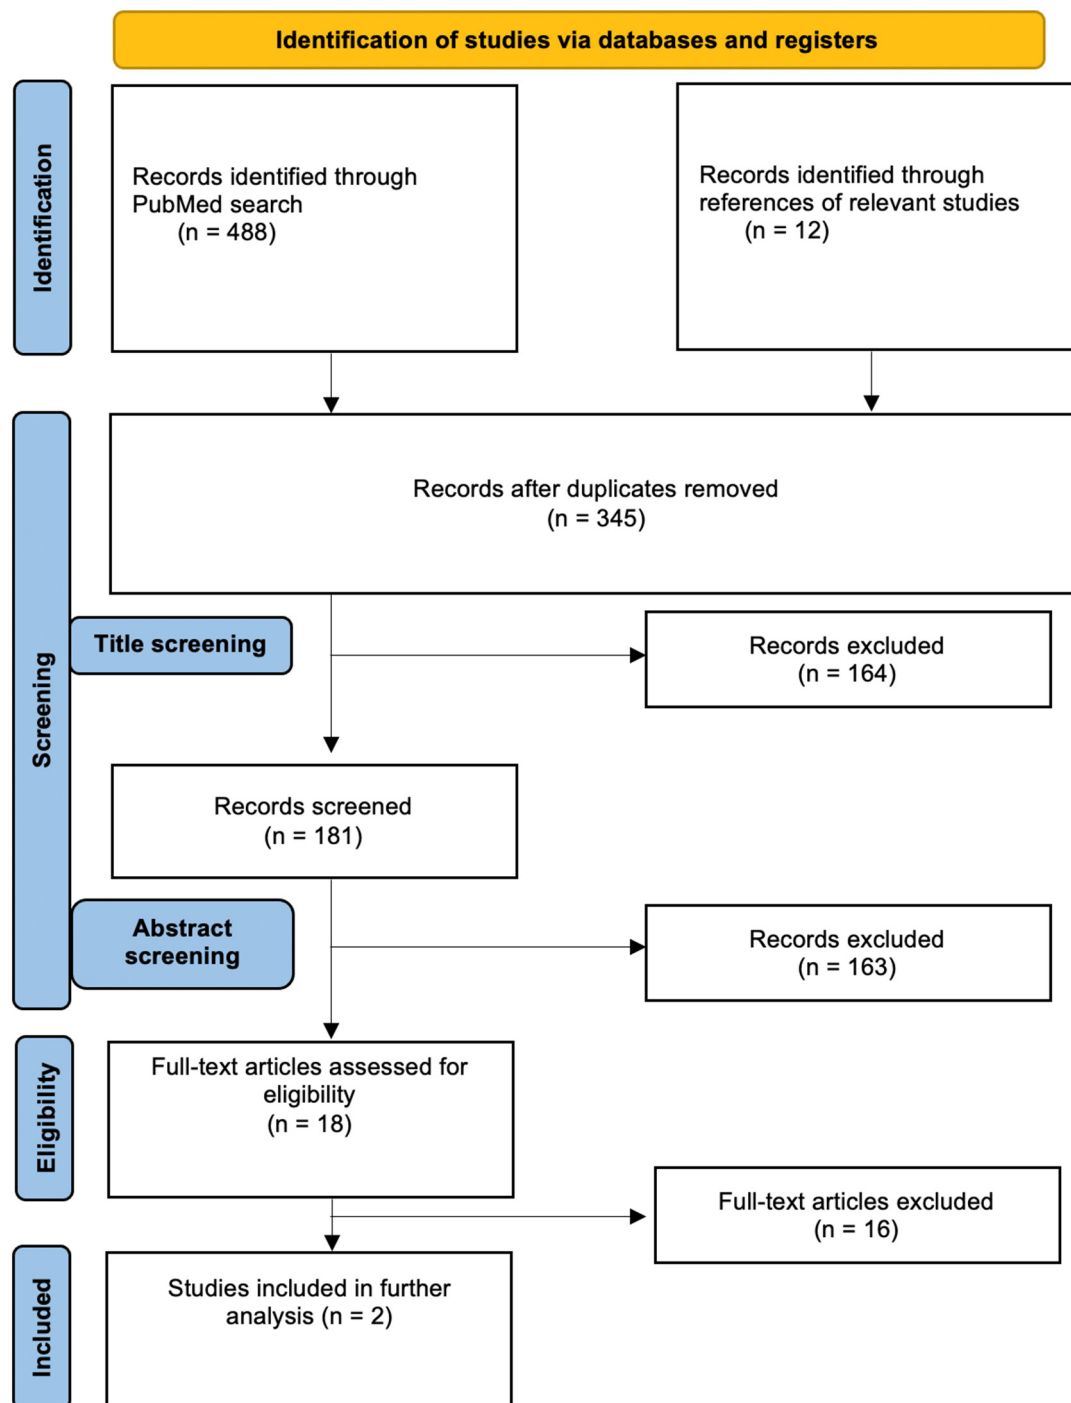

**Figure S1.** PRISMA Flowchart illustrating the literature search process.

Supplement: s1 [file s1]
